# Supplementary material for: Teaching Urology to Undergraduates: A Prospective Survey of What General Practitioners Need to Know
Source: Int J Environ Res Public Health. 2021 Nov 7;18(21):11687. doi: 10.3390/ijerph182111687 (PMC8583650; doi:10.3390/ijerph182111687)
Supplement: Supplementary file 1 [file ijerph-18-11687-s001.zip › Supplementary Table S1.pdf]

## **TITLE PAGE**

### **Teaching urology to undergraduates: A prospective survey of what General Practitioners need to know**

Borque-Fernando, Á<sup>1,2</sup>; Redondo Redondo, C.<sup>1,2</sup>; Orna Montesinos, C.<sup>3</sup>; Esteban Escaño, L.M.<sup>4</sup>; Denizón Arranz, S.<sup>5</sup>; Tejero Sánchez, A.<sup>2</sup>; García Ruiz, R.<sup>2</sup>; Sánchez Zalabardo, J.M.<sup>2</sup>; Gracia Romero, J.<sup>1,2</sup>; Monreal Hija, A.<sup>6</sup>; Gil Sanz, M.J.<sup>1,2</sup>; Sanz Saiz, G.<sup>7</sup>; Sanz Pozo, M.<sup>2</sup>; Romero Fernández, F.<sup>1</sup>

<sup>1</sup>Department of Surgery, Gynaecology and Obstetrics. Urology area. School of Medicine, University of Zaragoza (Spain).

<sup>2</sup>IIS Aragon

<sup>3</sup>Department of English and German Philology. School of Education. University of Zaragoza (Spain)

<sup>4</sup>Polytechnic University School la Almunia de Doña Godina, University of Zaragoza (Spain).

<sup>5</sup>Faculty of Health Sciences. University Francisco de Vitoria, Madrid (Spain)

<sup>6</sup>Department of Medicine, Psychiatry and Dermatology. Medicine Area. School of Medicine, University of Zaragoza (Spain)

<sup>7</sup>Department of Statistical Methods. Area of Statistics and Operational Research. Faculty of Science, University of Zaragoza (Spain)

# Supplementary file 1. Reliability analysis

| Item | Alpha | Std.Alpha | r(item,total) |
|------|-------|-----------|---------------|
| V6   | 0,935 | 0,931     | -0,213        |
| V7   | 0,93  | 0,928     | 0,381         |
| V8   | 0,926 | 0,925     | 0,755         |
| V9   | 0,927 | 0,925     | 0,766         |
| V10  | 0,928 | 0,926     | 0,547         |
| V11  | 0,926 | 0,924     | 0,796         |
| V12  | 0,927 | 0,925     | 0,655         |
| V13  | 0,927 | 0,925     | 0,7           |
| V14  | 0,927 | 0,925     | 0,689         |
| V15  | 0,928 | 0,926     | 0,568         |
| V16  | 0,927 | 0,925     | 0,643         |
| V17  | 0,928 | 0,926     | 0,653         |
| V18  | 0,93  | 0,928     | 0,19          |
| V19  | 0,929 | 0,927     | 0,438         |
| V20  | 0,929 | 0,926     | 0,5           |
| V21  | 0,926 | 0,924     | 0,831         |
| V22  | 0,93  | 0,928     | 0,288         |
| V23  | 0,931 | 0,929     | 0,097         |
| V24  | 0,928 | 0,926     | 0,549         |
| V25  | 0,932 | 0,93      | -0,014        |
| V26  | 0,93  | 0,927     | 0,389         |
| V27  | 0,93  | 0,927     | 0,445         |
| V28  | 0,93  | 0,928     | 0,293         |
| V29  | 0,929 | 0,927     | 0,406         |
| V30  | 0,934 | 0,931     | -0,161        |
| V31  | 0,93  | 0,928     | 0,216         |
| V32  | 0,926 | 0,924     | 0,812         |
| V33  | 0,93  | 0,928     | 0,301         |
| V34  | 0,929 | 0,927     | 0,442         |
| V35  | 0,928 | 0,925     | 0,668         |
| V36  | 0,929 | 0,926     | 0,473         |
| V37  | 0,927 | 0,925     | 0,736         |
| V38  | 0,927 | 0,925     | 0,692         |
| V39  | 0,932 | 0,933     | -0,363        |
| V40  | 0,929 | 0,927     | 0,472         |
| V41  | 0,927 | 0,925     | 0,661         |
| V42  | 0,928 | 0,925     | 0,663         |
| V43  | 0,928 | 0,925     | 0,594         |
| V44  | 0,929 | 0,926     | 0,499         |
| V45  | 0,934 | 0,932     | -0,245        |
| V46  | 0,93  | 0,926     | 0,449         |
| V47  | 0,929 | 0,926     | 0,44          |
| V48  | 0,928 | 0,926     | 0,612         |
| V49  | 0,929 | 0,927     | 0,456         |
| V50  | 0,93  | 0,929     | 0,2           |
| V51  | 0,929 | 0,926     | 0,482         |
| V52  | 0,928 | 0,926     | 0,591         |
| V53  | 0,929 | 0,927     | 0,432         |
| V54  | 0,928 | 0,926     | 0,586         |
| V55  | 0,934 | 0,931     | -0,183        |

|     |      |       |       |
|-----|------|-------|-------|
| V56 | 0,93 | 0,929 | 0,221 |
| V57 | 0,93 | 0,928 | 0,27  |
| V58 | 0,93 | 0,928 | 0,339 |
